# Supplementary material for: Ultra-trace determination of domoic acid in the Ebro Delta estuary by SPE-HILIC-HRMS
Source: Royal Society of Chemistry journal article supplement (doi:10.1039/c9ay02617g), 2020-01-01
Supplement: c9ay02617g1.pdf [file c9ay02617g1.pdf]

1  
2  
3  
4  
5  
6  
7  
8  
9  
10  
11  
12  
13  
14  
15  
16  
17  
18  
19

## SUPPORTING INFORMATION

### ULTRA-TRACE DETERMINATION OF DOMOIC ACID IN THE EBRO DELTA ESTUARY BY SPE-HILIC-HRMS

Cristina Bosch-Orea<sup>1</sup>, Josep Sanchís<sup>2,3</sup>, Damià Barceló<sup>1,2</sup> and Marinella Farré<sup>1,\*</sup>

<sup>1</sup> Water and soil quality research group, Department of Environmental Chemistry, IDAEA-CSIC, Barcelona (Spain)

<sup>2</sup> Catalan Institute for Water Research (ICRA), Scientific and Technological Park of the University of Girona, H2O Building, C/Emili Grahit, 101, E17003, Girona (Spain)

<sup>3</sup> University of Girona, 17071, Girona (Spain).

- Corresponding Author: Marinella Farré [mfuqam@cid.csic.es](mailto:mfuqam@cid.csic.es)

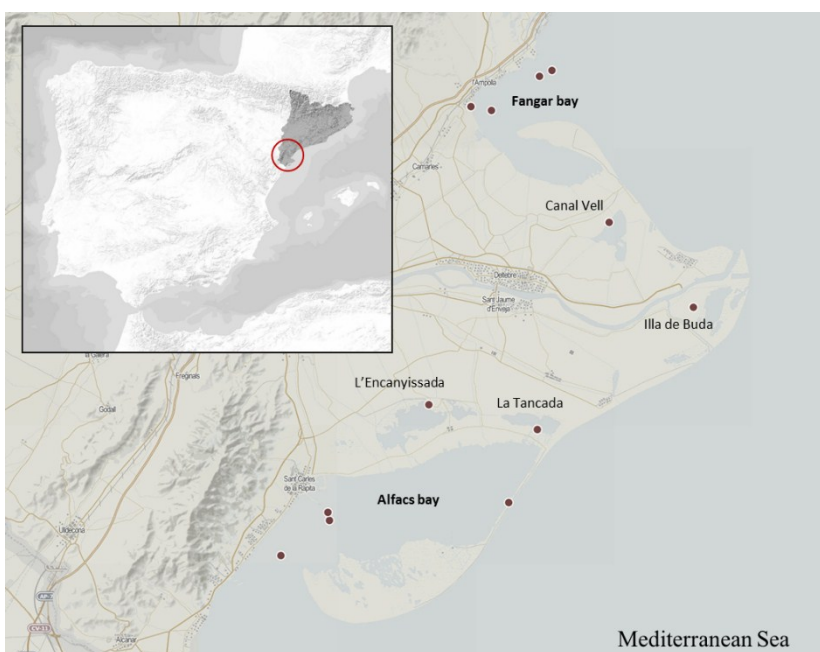

**Figure S1.** Sampling points in the Ebro's delta estuary for the three campaigns.

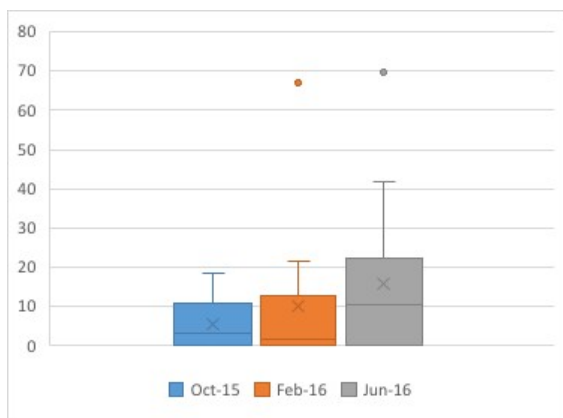

20

21 **Figure S2.** Box-and whisker plot for the three campaigns.

22

23

24

25

26

27

28

29 **Table S1.** Geographic coordinates expressed in decimal degrees (DD) of the sampling  
 30 points along the Ebro's river delta.

|              |    | Location       | Origin           | GPS coordinates (DD) |
|--------------|----|----------------|------------------|----------------------|
| Coastal area | 1  | Alfacs bay     | Beach            | 40.610015, 0.724525  |
|              | 2  |                | Shore            | 40.601432, 0.610270  |
|              | 3  |                | Open sea         | 40.584421, 0.579456  |
|              | 4  |                | Open sea         | 40.605240, 0.609279  |
|              | 5  | Fangar bay     | Beach            | 40.800592, 0.700231  |
|              | 6  |                | Shore            | 40.798693, 0.713269  |
|              | 7  |                | Open sea         | 40.815106, 0.743906  |
|              | 8  |                | Open sea         | 40.817899, 0.751861  |
| Lagoons      | 9  | La Tancada     | Middle of lagoon | 40.645143, 0.742599  |
|              | 10 | Illa de buda   | Middle of lagoon | 40.703963, 0.841655  |
|              | 11 | L'Encanyissada | Shore of lagoon  | 40.657110, 0.673552  |
|              | 12 | Canal Vell     | Shore of lagoon  | 40.745011, 0.788320  |

31

32

33

35 **Table S2.** Physic-chemical parameters measured at each point during the sampling.

|    | Temperature (°C) |        |        | pH     |        |        | Conductivity (uS/cm) |        |        |
|----|------------------|--------|--------|--------|--------|--------|----------------------|--------|--------|
|    | Oct-15           | Feb-16 | Jun-16 | Oct-15 | Feb-16 | Jun-16 | Oct-15               | Feb-16 | Jun-16 |
| 1  | 17.3             | -      | 29.1   | 7.6    | -      | 7.83   | 35971                | -      | 51104  |
| 2  | -                | 7.78   | 29.3   | -      | 7.85   | 7.83   | -                    | 37256  | 51015  |
| 3  | 19.2             | 12.2   | 29.3   | 7.78   | 7.85   | 7.9    | 45332                | 39462  | 50946  |
| 4  | -                | 12.6   | 28.1   | -      | 7.84   | 7.36   | -                    | 40346  | 51207  |
| 5  | 20.4             | 12.8   | 32.8   | 7.78   | 7.83   | 8.16   | 47732                | 40073  | 46286  |
| 6  | 17.9             | 12     | 26.7   | 7.75   | 7.81   | 7.82   | 41647                | 40554  | 41752  |
| 7  | 19.9             | 12.5   | 26.7   | 7.75   | 7.65   | 7.57   | 48564                | 40719  | 45335  |
| 8  | -                | 12.6   | 25.9   | -      | 7.74   | 7.41   | -                    | 40892  | 50119  |
| 9  | 17.3             | 14     | 28.9   | 8.32   | 7.78   | 8.14   | 32423                | 40227  | 47068  |
| 10 | 13.2             | 20.3   | 25.5   | 7.75   | 8.23   | 8.29   | 14978                | 7713   | 8560   |
| 11 | 10.1             | 18.7   | 24.5   | 7.5    | 8.48   | 8.01   | 21800                | 44222  | 35990  |
| 12 | 16.9             | 17.3   | 27.5   | 8.14   | 8.42   | 8.08   | 27426                | 32431  | 20725  |
